# Supplementary material for: Structure-guided discovery of potent and dual-acting human parainfluenza virus haemagglutinin–neuraminidase inhibitors
Source: Springer Nature journal article supplement (doi:10.1038/ncomms6268), 2014-10-20
Supplement: 41467_2014_BFncomms6268_MOESM3_ESM.mol [file 41467_2014_BFncomms6268_MOESM3_ESM.mol]

  ChemDraw10131412432D

 31 31  0  0  0  0  0  0  0  0999 V2000
   -0.2855    1.5374    0.0000 C   0  0  0  0  0  0  0  0  0  0  0  0
   -0.2855    0.7096    0.0000 C   0  0  0  0  0  0  0  0  0  0  0  0
    0.4314    0.2957    0.0000 C   0  0  0  0  0  0  0  0  0  0  0  0
    1.1483    0.7096    0.0000 C   0  0  0  0  0  0  0  0  0  0  0  0
    1.1483    1.5374    0.0000 C   0  0  0  0  0  0  0  0  0  0  0  0
    0.4314    1.9513    0.0000 O   0  0  0  0  0  0  0  0  0  0  0  0
   -1.0000    1.9499    0.0000 C   0  0  0  0  0  0  0  0  0  0  0  0
   -1.7144    1.5374    0.0000 C   0  0  0  0  0  0  0  0  0  0  0  0
   -2.4289    1.9499    0.0000 C   0  0  0  0  0  0  0  0  0  0  0  0
   -2.4289    2.7749    0.0000 O   0  0  0  0  0  0  0  0  0  0  0  0
   -1.7144    0.7987    0.0000 O   0  0  0  0  0  0  0  0  0  0  0  0
   -1.0000    2.7749    0.0000 O   0  0  0  0  0  0  0  0  0  0  0  0
    0.4314   -0.5293    0.0000 N   0  0  0  0  0  0  0  0  0  0  0  0
   -0.2855    2.2790    0.0000 H   0  0  0  0  0  0  0  0  0  0  0  0
   -0.2383   -1.0158    0.0000 C   0  0  0  0  0  0  0  0  0  0  0  0
    0.0175   -1.8031    0.0000 C   0  0  0  0  0  0  0  0  0  0  0  0
    0.8453   -1.8031    0.0000 N   0  0  0  0  0  0  0  0  0  0  0  0
    1.1011   -1.0158    0.0000 N   0  0  0  0  0  0  0  0  0  0  0  0
   -0.4674   -2.4705    0.0000 C   0  0  0  0  0  0  0  0  0  0  0  0
   -1.2952   -2.4705    0.0000 O   0  0  0  0  0  0  0  0  0  0  0  0
   -1.7091   -3.1874    0.0000 C   0  0  0  0  0  0  0  0  0  0  0  0
   -1.0000    0.2971    0.0000 N   0  0  0  0  0  0  0  0  0  0  0  0
   -0.8696   -1.1926    0.0000 O   0  0  0  0  0  0  0  0  0  0  0  0
   -1.2821   -0.4781    0.0000 C   0  0  0  0  0  0  0  0  0  0  0  0
   -2.1040   -0.5500    0.0000 C   0  0  0  0  0  0  0  0  0  0  0  0
    1.8627    1.9499    0.0000 C   0  0  0  0  0  0  0  0  0  0  0  0
    2.5772    1.5374    0.0000 O   0  0  0  0  0  0  0  0  0  0  0  0
    1.8627    2.7749    0.0000 O   0  5  0  0  0  0  0  0  0  0  0  0
   -2.5772    0.1258    0.0000 C   0  0  0  0  0  0  0  0  0  0  0  0
   -2.4527   -1.2977    0.0000 C   0  0  0  0  0  0  0  0  0  0  0  0
    1.1483    3.1874    0.0000 Na  0  3  0  0  0  0  0  0  0  0  0  0
  1  2  1  0      
  2  3  1  0      
  3  4  1  0      
  4  5  2  0      
  5  6  1  0      
  6  1  1  0      
  1  7  1  0      
  7  8  1  0      
  8  9  1  0      
  9 10  1  0      
  8 11  1  6      
  7 12  1  1      
  2 22  1  1      
  3 13  1  6      
  1 14  1  1      
  5 26  1  0      
 13 15  1  0      
 15 16  2  0      
 16 17  1  0      
 17 18  2  0      
 18 13  1  0      
 16 19  1  0      
 19 20  1  0      
 20 21  1  0      
 22 24  1  0      
 23 24  2  0      
 24 25  1  0      
 26 27  2  0      
 26 28  1  0      
 25 29  1  0      
 25 30  1  0      
M  CHG  2  28  -1  31   1
M  END
