# Supplementary material for: Structure-guided discovery of potent and dual-acting human parainfluenza virus haemagglutinin–neuraminidase inhibitors
Source: Springer Nature journal article supplement (doi:10.1038/ncomms6268), 2014-10-20
Supplement: 41467_2014_BFncomms6268_MOESM9_ESM.mol [file 41467_2014_BFncomms6268_MOESM9_ESM.mol]

  ChemDraw10131412432D

 40 41  0  0  0  0  0  0  0  0999 V2000
    0.7121    1.4834    0.0000 C   0  0  0  0  0  0  0  0  0  0  0  0
    0.7121    0.6556    0.0000 C   0  0  0  0  0  0  0  0  0  0  0  0
    1.4289    0.2417    0.0000 C   0  0  0  0  0  0  0  0  0  0  0  0
    2.1458    0.6556    0.0000 C   0  0  0  0  0  0  0  0  0  0  0  0
    2.1458    1.4834    0.0000 C   0  0  0  0  0  0  0  0  0  0  0  0
    1.4289    1.8972    0.0000 O   0  0  0  0  0  0  0  0  0  0  0  0
   -0.0024    1.8959    0.0000 C   0  0  0  0  0  0  0  0  0  0  0  0
   -0.7169    1.4834    0.0000 C   0  0  0  0  0  0  0  0  0  0  0  0
   -1.4314    1.8959    0.0000 C   0  0  0  0  0  0  0  0  0  0  0  0
   -0.1461    0.1856    0.0000 N   0  0  0  0  0  0  0  0  0  0  0  0
    1.4289   -0.5833    0.0000 N   0  0  0  0  0  0  0  0  0  0  0  0
    0.7121    2.2250    0.0000 H   0  0  0  0  0  0  0  0  0  0  0  0
   -0.1461   -0.6422    0.0000 C   0  0  0  0  0  0  0  0  0  0  0  0
    0.4246   -0.9397    0.0000 O   0  0  0  0  0  0  0  0  0  0  0  0
   -0.8606   -1.0547    0.0000 C   0  0  0  0  0  0  0  0  0  0  0  0
    0.7592   -1.0699    0.0000 C   0  0  0  0  0  0  0  0  0  0  0  0
    1.0150   -1.8572    0.0000 C   0  0  0  0  0  0  0  0  0  0  0  0
    1.8428   -1.8572    0.0000 N   0  0  0  0  0  0  0  0  0  0  0  0
    2.0986   -1.0699    0.0000 N   0  0  0  0  0  0  0  0  0  0  0  0
    0.5301   -2.5246    0.0000 C   0  0  0  0  0  0  0  0  0  0  0  0
    0.9440   -3.2415    0.0000 O   0  0  0  0  0  0  0  0  0  0  0  0
   -1.6602   -0.8405    0.0000 C   0  0  0  0  0  0  0  0  0  0  0  0
   -0.8606   -1.8825    0.0000 C   0  0  0  0  0  0  0  0  0  0  0  0
    0.5301   -3.9584    0.0000 C   0  0  0  0  0  0  0  0  0  0  0  0
   -2.1458    1.4834    0.0000 O   0  0  0  0  0  0  0  0  0  0  0  0
   -3.5748    1.4834    0.0000 O   0  0  0  0  0  0  0  0  0  0  0  0
   -2.8603    1.8959    0.0000 C   0  0  0  0  0  0  0  0  0  0  0  0
   -2.8603    2.7209    0.0000 C   0  0  0  0  0  0  0  0  0  0  0  0
   -0.7169    0.6584    0.0000 O   0  0  0  0  0  0  0  0  0  0  0  0
   -1.4314   -0.5791    0.0000 O   0  0  0  0  0  0  0  0  0  0  0  0
   -1.4314    0.2459    0.0000 C   0  0  0  0  0  0  0  0  0  0  0  0
   -2.1458    0.6584    0.0000 C   0  0  0  0  0  0  0  0  0  0  0  0
   -0.0024    2.7209    0.0000 O   0  0  0  0  0  0  0  0  0  0  0  0
   -0.7169    3.9584    0.0000 O   0  0  0  0  0  0  0  0  0  0  0  0
   -0.7169    3.1334    0.0000 C   0  0  0  0  0  0  0  0  0  0  0  0
   -1.4314    2.7209    0.0000 C   0  0  0  0  0  0  0  0  0  0  0  0
    2.8603    1.8959    0.0000 C   0  0  0  0  0  0  0  0  0  0  0  0
    3.5748    1.4834    0.0000 O   0  0  0  0  0  0  0  0  0  0  0  0
    2.8603    2.7209    0.0000 O   0  0  0  0  0  0  0  0  0  0  0  0
    2.1458    3.1334    0.0000 C   0  0  0  0  0  0  0  0  0  0  0  0
  1  2  1  0      
  2  3  1  0      
  3  4  1  0      
  4  5  2  0      
  5  6  1  0      
  6  1  1  0      
  1  7  1  0      
  7  8  1  0      
  8  9  1  0      
  9 25  1  0      
  8 29  1  6      
  7 33  1  1      
  2 10  1  1      
  3 11  1  6      
  1 12  1  1      
  5 37  1  0      
 10 13  1  0      
 13 14  2  0      
 13 15  1  0      
 11 16  1  0      
 16 17  2  0      
 17 18  1  0      
 18 19  2  0      
 19 11  1  0      
 17 20  1  0      
 20 21  1  0      
 15 22  1  0      
 15 23  1  0      
 21 24  1  0      
 25 27  1  0      
 26 27  2  0      
 27 28  1  0      
 29 31  1  0      
 30 31  2  0      
 31 32  1  0      
 33 35  1  0      
 34 35  2  0      
 35 36  1  0      
 37 38  2  0      
 37 39  1  0      
 39 40  1  0      
M  END
